# Supplementary material for: Comparison of circulating tumor cell (CTC) detection rates with epithelial cell adhesion molecule (EpCAM) and cell surface vimentin (CSV) antibodies in different solid tumors: a retrospective study
Source: PeerJ journal article supplement (doi:10.7717/peerj.10777), 2021-03-02
Supplement: Supplement_Figure_1.pdf [file Supplement_Figure_1.pdf]

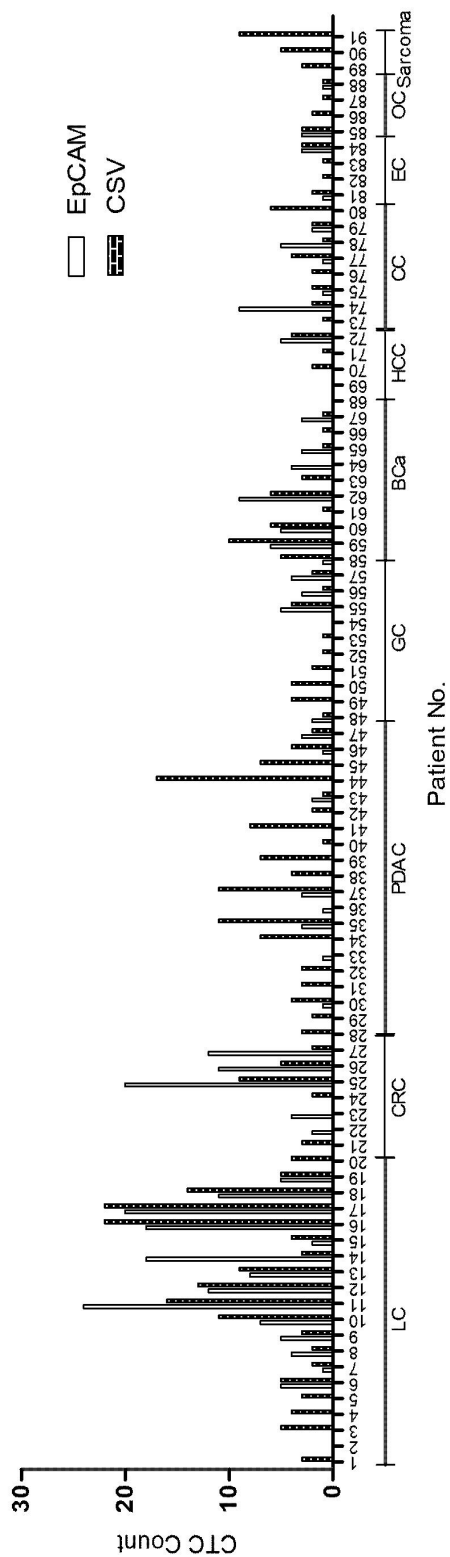

**Supplement Figure 1**

Comparison of CTC count with EpCAM and CSV antibodies in the same patients. LC = lung cancer; CRC = colorectal cancer; BCa = breast cancer; GC = gastric cancer; PDAC = pancreatic ductal adenocarcinoma; CC = cervical cancer; EC = esophageal cancer; HCC = hepatocellular carcinoma; OC = ovarian cancer.
