# Supplementary material for: Comparison of circulating tumor cell (CTC) detection rates with epithelial cell adhesion molecule (EpCAM) and cell surface vimentin (CSV) antibodies in different solid tumors: a retrospective study
Source: PeerJ journal article supplement (doi:10.7717/peerj.10777), 2021-03-02
Supplement: Supplement_Figure_2.pdf [file Supplement_Figure_2.pdf]

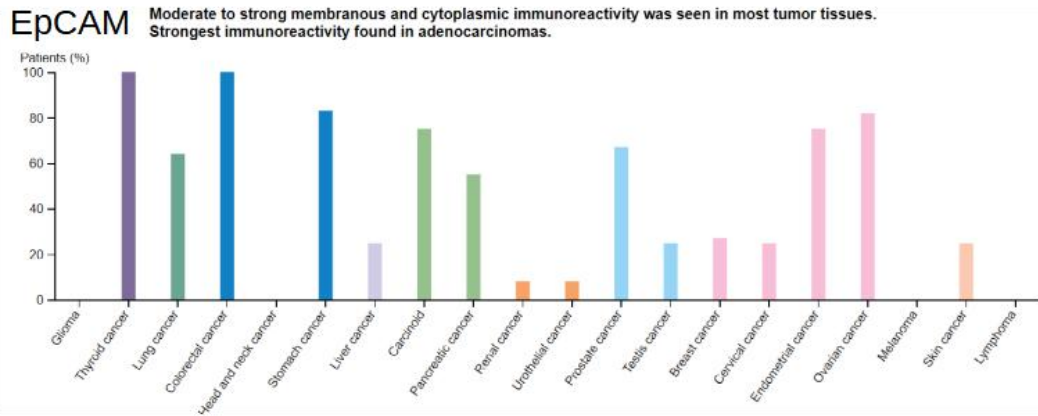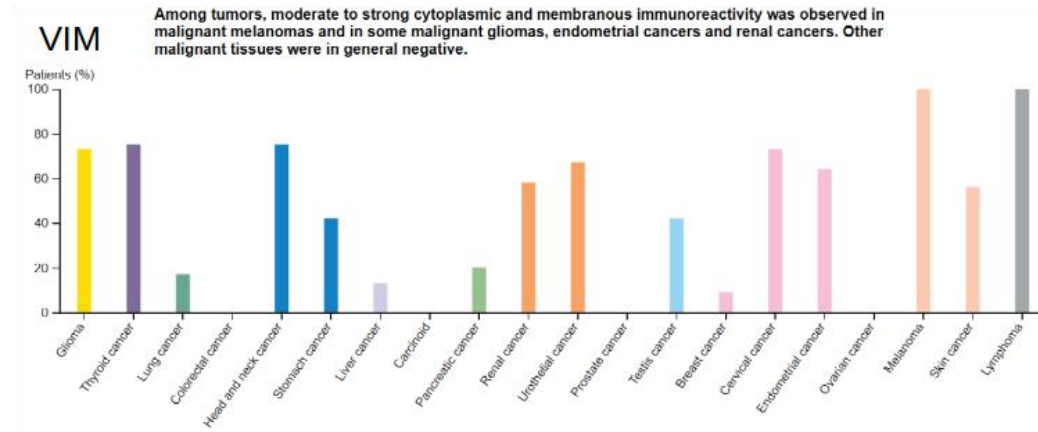

## Supplement Figure 2

The Cancer Genome Atlas (TCGA) dataset of EpCAM and Vim expression in different cancers.
