# Supplementary material for: Comparison of circulating tumor cell (CTC) detection rates with epithelial cell adhesion molecule (EpCAM) and cell surface vimentin (CSV) antibodies in different solid tumors: a retrospective study
Source: PeerJ. 2021 Mar 2;9:e10777. doi: 10.7717/peerj.10777 (PMC7934682; doi:10.7717/peerj.10777)
Supplement: Supplemental Information 1 [file peerj-09-10777-s001.xlsx]

## Sheet: Sheet1
Date	Name	Gender	Age (years)	Cancer Type	Classification	Medical Center	Histological Type	TNM Stage	Cancer Stage	Disease History	Clinical Diagnosis	Treatment History	CTC Capture Antibody	CTC Count
2017-05-05		Male	44		Healthy	SRR							CSV	0
2017-05-06		Female	52		Healthy	ZCH							CSV	0
2017-05-07		Female	46		Breast	SRR	ductal	Pt1n0m0	ⅠA				CSV	2
2017-05-07		Female	32		Breast	SAH	adenocarcinoma						CSV	3
2017-05-07		Male	57		Lung	SAH							CSV	9
2017-05-07		Female	74		Colorectal	ZCH							EpCAM	3
2017-05-08		Male	36		Lung	ZCH	adenocarcinoma	T4N2M1a	ⅣA				EpCAM	4
2017-05-08		Female	43		Cervical	ZCH	squamous cell carcinoma		IIIB				EpCAM	5
2017-05-08		Male	61		HNSCC	ZCH	squamous cell carcinoma						EpCAM	0
2017-05-08		Female	65		Cervical	SRR							CSV	1
2017-05-08		Male	62		Lung	SAH							CSV	2
2017-05-08		Female	64		Lung	SAH							CSV	0
2017-05-08		Female	73		Hepatocarcinoma	ZCH							CSV	7
2017-05-08		Female	62		Colorectal	ZCH		T4aN0M1					EpCAM	3
2017-05-09		Female	72		Healthy	SRR							CSV	0
2017-05-10		Female	57		Cervical	SRR							CSV	1
2017-05-10		Male	60		Colorectal	ZCH							EpCAM	4
2017-05-11		Male	56		HNSCC	ZCH							CSV	0
2017-05-13		Female	58		Lung	SAH							EpCAM	0
2017-05-13		Female	57		Hepatocarcinoma	SAH							CSV	0
2017-05-13		Female	52		Colorectal	SAH							CSV	1
2017-05-14		Female	40		Cervical	SAH	squamous cell carcinoma		IIIB				EpCAM	0
2017-05-14		Male	68		Stomach (gastric)	SRR							CSV	3
2017-05-14		Female	49		Breast	SAH		cT4N2Mx					CSV	2
2017-05-15		Male	62		Lung	ZCH		T1bN0M0	ⅠA2				EpCAM	1
2017-05-15		Female	43		Cervical	SRR	adenocarcinoma	T1N0M1	IV				EpCAM	0
2017-05-15		Female	43		Cervical	SRR	adenocarcinoma	T1N0M1	IV				CSV	6
2017-05-15		Female	45		Breast	SAH	ductal	T3N2M1	IV				CSV	1
2017-05-16		Female	46		Breast	SAH							EpCAM	0
2017-05-17		Female	51		HNSCC	SAH		cT3N2M0					EpCAM	0
2017-05-17		Male	63		Pancreas (PDAS)	SAH							EpCAM	0
2017-05-17		Male	63		Pancreas (PDAS)	SAH							CSV	7
2017-05-17		Female	48		Pancreas (PDAS)	SAH							CSV	3
2017-05-17		Male	63		Pancreas (PDAS)	ZCH							EpCAM	2
2017-05-17		Male	63		Pancreas (PDAS)	ZCH							CSV	1
2017-05-18		Male	57		Bladder	ZCH		T2N0M0					CSV	1
2017-05-18		Female	67		Esophageal	SRR		T3N2M0					EpCAM	5
2017-05-18		Female	67		Lung	SAH							CSV	4
2017-05-20		Male	55		Lung	ZCH		T1bN0M0	ⅠA2				CSV	0
2017-05-20		Female	60		Healthy	SRR							EpCAM	0
2017-05-20		Male	53		Hepatocarcinoma	ZCH							CSV	0
2017-05-20		Male	53		Hepatocarcinoma	ZCH							EpCAM	0
2017-05-20		Female	70		Breast	ZCH							CSV	0
2017-05-21		Male	55		Lung	ZCH		pT3N0M0	Ⅱb				EpCAM	1
2017-05-21		Male	25		Brain (Glioma)	ZCH							CSV	3
2017-05-22		Male	58		Pancreas (PDAS)	SAH							EpCAM	3
2017-05-22		Male	55		Esophageal	ZCH		T1N0M0					CSV	4
2017-05-22		Female	43		Brain (Glioma)	ZCH							CSV	1
2017-05-23		Female	69		Lung	ZCH		pT1bN0M0	ⅠA				EpCAM	0
2017-05-23		Male	52		HNSCC	SRR							EpCAM	18
2017-05-23		Male	62		Esophageal	ZCH							EpCAM	0
2017-05-24		Male	60		Healthy	SRR							CSV	0
2017-05-24		Female	50		Healthy	SRR							EpCAM	0
2017-05-24		Female	30		HNSCC	SAH							EpCAM	4
2017-05-24		Male	62		Esophageal	SAH							CSV	0
2017-05-24		Female	81		Esophageal	ZCH							CSV	4
2017-05-25		Male	63		Colorectal	SRR							CSV	0
2017-05-27		Male	68		Stomach (gastric)	ZCH							CSV	0
2017-05-28		Female	46		Cervical	SRR			ⅡA2				EpCAM	0
2017-05-28		Male	53		Lung	SAH							CSV	2
2017-05-29		Female	50		Breast	SRR	ductal	T1N1M0	II				CSV	1
2017-05-29		Female	50		Breast	SRR	ductal	T1N1M0	II				EpCAM	3
2017-05-29		Male	57		Lung	SAH							EpCAM	8
2017-05-29		Male	57		Lung	SAH							CSV	9
2017-05-29		Male	66		Healthy	SAH							EpCAM	0
2017-05-29		Male	67		Bladder	ZCH							CSV	3
2017-05-30		Female	60		Stomach (gastric)	SRR							CSV	4
2017-05-30		Male	35		Lung	SAH							CSV	2
2017-05-30		Female	57		Breast	SAH		T1N1M1					CSV	6
2017-05-30		Female	69		Colorectal	SAH							CSV	0
2017-05-30		Female	52		Brain (Glioma)	ZCH							CSV	2
2017-05-31		Female	59		Sacroma	SRR		T2N0M0	Ⅲ				CSV	9
2017-05-31		Female	59		Sacroma	SRR		T2N0M0	Ⅲ				EpCAM	0
2017-05-31		Male	59		Lung	SRR		T2aN2M0	ⅢA				EpCAM	8
2017-05-31		Male	65		Lung	SAH	squamous cell carcinoma						CSV	0
2017-05-31		Male	63		Pancreas (PDAS)	SAH							CSV	1
2017-05-31		Female	62		Hepatocarcinoma	ZCH							CSV	0
2017-06-01		Female	42		Cervical	SRR							EpCAM	5
2017-06-01		Male	47		Lung	SAH							CSV	4
2017-06-01		Female	64		Lung	SAH							CSV	4
2017-06-01		Male	71		Pancreas (PDAS)	SAH							EpCAM	0
2017-06-01		Male	71		Pancreas (PDAS)	SAH							CSV	4
2017-06-04		Female	60		Breast	SRR							CSV	3
2017-06-04		Male	71		Pancreas (PDAS)	SAH							EpCAM	0
2017-06-04		Female	64		Lung	ZCH							EpCAM	7
2017-06-05		Male	35		Lung	ZCH							EpCAM	0
2017-06-05		Male	48		HNSCC	ZCH							CSV	3
2017-06-06		Female	43		Cervical	SRR	squamous cell carcinoma		ⅡA				EpCAM	0
2017-06-06		Male	71		Colorectal	SRR							EpCAM	2
2017-06-06		Female	62		Stomach (gastric)	SAH							CSV	2
2017-06-06		Female	68		Bladder	ZCH							CSV	2
2017-06-10		Male	37		Lung	SRR	adenocarcinoma	T3N0M1	ⅣB				EpCAM	2
2017-06-10		Female	44		Cervical	SRR							CSV	0
2017-06-10		Female	78		Lung	ZCH							CSV	6
2017-06-10		Female	60		Esophageal	ZCH							CSV	1
2017-06-10		Female	54		Breast	ZCH							EpCAM	4
2017-06-11		Male	66		Lung	ZCH	adenocarcinoma	T3N3M1	ⅣB				CSV	0
2017-06-11		Male	59		Healthy	SRR							CSV	0
2017-06-11		Female	54		Healthy	SRR							CSV	0
2017-06-11		Female	55		Colorectal	ZCH							EpCAM	0
2017-06-12		Female	58		Ovary	SRR							CSV	0
2017-06-12		Male	62		Colorectal	ZCH							EpCAM	7
2017-06-13		Female	47		Cervical	SRR		T3N3M1	IV				EpCAM	6
2017-06-13		Female	57		Cervical	SRR							CSV	4
2017-06-13		Male	71		Stomach (gastric)	ZCH							CSV	0
2017-06-13		Male	71		Stomach (gastric)	ZCH							EpCAM	0
2017-06-14		Male	52		HNSCC	ZCH	squamous cell carcinoma	T4AN2BM0	IVA				CSV	5
2017-06-14		Female	42		Colorectal	SRR		T2N0M0					CSV	2
2017-06-14		Female	61		Stomach (gastric)	SAH							CSV	4
2017-06-14		Male	53		HNSCC	ZCH							CSV	2
2017-06-14		Male	69		Hepatocarcinoma	ZCH							EpCAM	0
2017-06-14		Male	69		Hepatocarcinoma	ZCH							CSV	2
2017-06-17		Female	65		Stomach (gastric)	ZCH	adenocarcinoma						CSV	4
2017-06-17		Female	58		Healthy	SRR							EpCAM	0
2017-06-17		Male	59		Pancreas (PDAS)	SAH							CSV	4
2017-06-17		Male	59		Pancreas (PDAS)	SAH							EpCAM	1
2017-06-18		Female	70		Ovary	SRR	adenocarcinoma						CSV	3
2017-06-18		Female	70		Ovary	SRR	adenocarcinoma						EpCAM	3
2017-06-18		Male	60		Lung	SRR							CSV	2
2017-06-18		Female	42		Pancreas (PDAS)	SAH							CSV	17
2017-06-18		Female	42		Pancreas (PDAS)	SAH							EpCAM	0
2017-06-18		Male	56		Hepatocarcinoma	ZCH							CSV	1
2017-06-18		Male	56		Hepatocarcinoma	ZCH							EpCAM	0
2017-06-18		Female	74		Hepatocarcinoma	ZCH							CSV	3
2017-06-19		Female	50		HNSCC	SAH	adenocarcinoma	T2N1M0	III				EpCAM	20
2017-06-19		Male	69		Lung	SAH							CSV	16
2017-06-19		Male	69		Lung	SAH							EpCAM	24
2017-06-19		Male	69		Bladder	ZCH							CSV	1
2017-06-20		Female	34		HNSCC	SAH	nonkeratinized squamous cell carcinoma	T2N2M1	IVB				EpCAM	2
2017-06-20		Male	64		HNSCC	SAH	nonkeratinized squamous cell carcinoma	cT3N3M0	IV				CSV	3
2017-06-20		Male	72		Esophageal	ZCH	squamous cell carcinoma						CSV	2
2017-06-20		Female	55		Pancreas (PDAS)	SAH							EpCAM	0
2017-06-20		Female	36		Lung	ZCH							CSV	1
2017-06-20		Male	75		Esophageal	ZCH							EpCAM	0
2017-06-20		Male	75		Esophageal	ZCH							CSV	1
2017-06-20		Female	67		Stomach (gastric)	ZCH							CSV	0
2017-06-20		Female	67		Stomach (gastric)	ZCH							CSV	0
2017-06-21		Male	52		Healthy	ZCH							CSV	0
2017-06-21		Female	74		Breast	ZCH							EpCAM	7
2017-06-22		Female	47		Healthy	SRR							CSV	1
2017-06-22		Male	53		Esophageal	SAH							EpCAM	1
2017-06-22		Male	58		Colorectal	ZCH							EpCAM	4
2017-06-24		Female	71		Breast	SRR	ductal	TxNxM1					CSV	3
2017-06-24		Female	46		Healthy	SAH							EpCAM	1
2017-06-25		Male	56		Colorectal	SAH		pT3N1M1b	ⅣB				CSV	3
2017-06-25		Female	47		Pancreas (PDAS)	SAH							EpCAM	0
2017-06-25		Male	49		Colorectal	SAH							CSV	5
2017-06-25		Female	65		Stomach (gastric)	ZCH							CSV	0
2017-06-26		Male	58		Lung	SAH		T3N3M1	ⅣB				EpCAM	2
2017-06-26		Female	49		Healthy	SRR							CSV	0
2017-06-26		Female	46		Breast	SRR		T3N2M1					CSV	3
2017-06-26		Female	78		Stomach (gastric)	ZCH							CSV	0
2017-06-26		Male	55		Colorectal	ZCH							CSV	1
2017-06-27		Female	53		Cervical	SRR							CSV	0
2017-06-27		Female	66		Breast	SRR							CSV	0
2017-06-27		Male	63		Colorectal	SRR							CSV	0
2017-06-27		Female	41		Hepatocarcinoma	ZCH							CSV	8
2017-06-28		Male	62		Lung	SAH		cT2aN3M1a	ⅣA				CSV	9
2017-06-28		Female	46		HNSCC	SAH	nonkeratinized squamous cell carcinoma	Ct2n2m0	III				EpCAM	7
2017-06-28		Female	65		Healthy	SRR							CSV	0
2017-06-28		Male	58		Lung	SAH							CSV	4
2017-07-02		Female	47		Ovary	SRR							CSV	4
2017-07-02		Female	46		Stomach (gastric)	SAH							CSV	0
2017-07-02		Female	59		Stomach (gastric)	ZCH							CSV	3
2017-07-03		Male	57		Colorectal	SAH							CSV	3
2017-07-04		Female	61		Healthy	SRR							EpCAM	0
2017-07-05		Male	58		Lung	ZCH		cT1cN3Mx					CSV	0
2017-07-05		Female	62		Healthy	ZCH							CSV	0
2017-07-06		Female	55		Esophageal	ZCH	squamous cell carcinoma	TxN2M1					EpCAM	3
2017-07-06		Female	55		Esophageal	ZCH	squamous cell carcinoma	TxN2M1					CSV	3
2017-07-08		Male	60		Esophageal	ZCH	squamous cell carcinoma	T3N1M0					CSV	2
2017-07-08		Male	60		Lung	SRR							EpCAM	6
2017-07-08		Female	55		HNSCC	SAH							EpCAM	2
2017-07-09		Female	68		Breast	ZCH		TXN3M1	IV				EpCAM	6
2017-07-09		Male	65		Lung	SAH							CSV	2
2017-07-09		Female	57		Breast	ZCH		T1N0M1					CSV	2
2017-07-10		Female	59		Healthy	SRR							CSV	0
2017-07-10		Female	71		Breast	SAH							CSV	4
2017-07-10		Male	50		Pancreas (PDAS)	SAH							EpCAM	0
2017-07-12		Female	45		Cervical	SRR							CSV	3
2017-07-12		Female	58		Healthy	SRR							EpCAM	0
2017-07-13		Female	66		Lung	ZCH	adenocarcinoma						CSV	2
2017-07-13		Female	52		Breast	ZCH	ductal						EpCAM	2
2017-07-13		Male	62		Brain (Glioma)	ZCH							CSV	3
2017-07-16		Male	54		Healthy	SRR							EpCAM	0
2017-07-16		Female	67		Lung	SAH							EpCAM	2
2017-07-16		Male	45		Prostate	SAH							CSV	2
2017-07-16		Male	48		Lung	ZCH							CSV	0
2017-07-16		Male	60		Lung	ZCH							EpCAM	4
2017-07-16		Female	71		Ovary	ZCH							CSV	2
2017-07-16		Male	65		Prostate	ZCH							EpCAM	0
2017-07-16		Female	74		Stomach (gastric)	ZCH							EpCAM	1
2017-07-16		Female	55		Colorectal	ZCH							CSV	4
2017-07-17		Female	47		Breast	SAH		TNM1	II				EpCAM	0
2017-07-17		Female	47		Breast	SAH		TNM1	II				CSV	1
2017-07-17		Female	33		Colorectal	SRR							CSV	0
2017-07-17		Male	66		Healthy	SAH							CSV	0
2017-07-17		Female	49		Stomach (gastric)	ZCH							CSV	5
2017-07-18		Female	54		HNSCC	SAH	nonkeratinized squamous cell carcinoma	T3N1M0	III				CSV	6
2017-07-18		Female	47		HNSCC	ZCH	nonkeratinized squamous cell carcinoma	T3N1M0	III				CSV	5
2017-07-18		Male	57		Bladder	ZCH							CSV	0
2017-07-19		Male	56		Colorectal	ZCH	adenocarcinoma						EpCAM	6
2017-07-19		Female	57		Pancreas (PDAS)	SAH							CSV	1
2017-07-19		Female	57		Pancreas (PDAS)	SAH							EpCAM	0
2017-07-20		Female	53		Breast	SRR	ductal	T2N2M0					CSV	2
2017-07-20		Female	62		Ovary	SRR	mucous	T2N3M1					EpCAM	0
2017-07-22		Female	54		Breast	SAH		T2N0M1	IV				CSV	2
2017-07-22		Male	48		Healthy	SRR							CSV	0
2017-07-23		Female	47		Cervical	SRR							EpCAM	2
2017-07-23		Female	47		Cervical	SRR							EpCAM	0
2017-07-23		Male	72		Colorectal	SRR							CSV	4
2017-07-23		Male	55		Lung	ZCH		T2N2M2 Ⅳ					EpCAM	0
2017-07-23		Male	52		Healthy	ZCH							CSV	0
2017-07-24		Female	45		Ovary	SRR			ⅣB				CSV	1
2017-07-24		Female	45		Ovary	SRR			ⅣB				EpCAM	0
2017-07-24		Female	42		Breast	SAH	ductal	T2N0M1	IV				CSV	5
2017-07-24		Female	60		Cervical	SRR							CSV	0
2017-07-24		Female	34		Healthy	SRR							EpCAM	0
2017-07-24		Female	81		Esophageal	SAH		T3N2M0					CSV	2
2017-07-24		Female	81		Esophageal	SAH		T3N2M0					EpCAM	1
2017-07-25		Male	53		Healthy	SRR							EpCAM	0
2017-07-25		Female	41		Cervical	SRR							EpCAM	8
2017-07-25		Male	59		Lung	SAH							CSV	6
2017-07-25		Female	50		Breast	SAH		PT1N0（sn）M0					CSV	3
2017-07-25		Female	50		Breast	SAH		PT1N0（sn）M0					EpCAM	0
2017-07-25		Female	59		Breast	ZCH							CSV	4
2017-07-26		Female	75		Lung	ZCH	adenocarcinoma	cT4N3M1a	Ⅳa				EpCAM	6
2017-07-26		Male	73		Colorectal	SAH							CSV	4
2017-07-26		Female	72		Lung	ZCH							CSV	4
2017-07-27		Female	54		Lung	ZCH		pT1a(mi)N0M0	ⅠA				CSV	2
2017-07-27		Female	72		Breast	SRR		T4N1M1					CSV	2
2017-07-27		Female	44		HNSCC	ZCH							EpCAM	3
2017-07-27		Female	43		Brain (Glioma)	ZCH							CSV	6
2017-07-28		Female	48		Cervical	SRR	squamous cell carcinoma		IIIB				EpCAM	3
2017-07-28		Female	61		Stomach (gastric)	SAH							EpCAM	0
2017-07-28		Female	60		Stomach (gastric)	SAH							EpCAM	1
2017-07-28		Female	61		Healthy	ZCH							CSV	0
2017-07-30		Male	63		Colorectal	SAH	adenocarcinoma	TxN2M1	Ⅳ				EpCAM	5
2017-07-30		Female	70		HNSCC	ZCH	adenoid cystic carcinoma	TXN0M1	IV				CSV	4
2017-07-30		Female	55		Colorectal	SAH	adenocarcinoma						CSV	1
2017-07-30		Female	49		Lung	SAH							CSV	2
2017-07-30		Male	45		Colorectal	SAH							CSV	3
2017-08-01		Female	31		Breast	SAH	adenocarcinoma						CSV	6
2017-08-01		Female	59		Breast	SRR	ductal	cT2N2Mx					CSV	3
2017-08-01		Male	32		Healthy	SRR							CSV	0
2017-08-01		Female	58		Lung	SAH							CSV	3
2017-08-01		Male	65		Colorectal	SAH							EpCAM	4
2017-08-02		Female	20		Sacroma	SAH		T2N0M0	Ⅲ				CSV	1
2017-08-02		Male	31		Healthy	SRR							EpCAM	0
2017-08-02		Female	73		Lung	SAH							EpCAM	3
2017-08-02		Male	58		Pancreas (PDAS)	SAH							EpCAM	0
2017-08-02		Male	59		Pancreas (PDAS)	SAH							EpCAM	0
2017-08-02		Male	47		Pancreas (PDAS)	SAH							CSV	2
2017-08-02		Female	60		Breast	ZCH							EpCAM	3
2017-08-03		Male	36		Stomach (gastric)	SAH							EpCAM	0
2017-08-03		Female	40		Brain (Glioma)	ZCH							CSV	0
2017-08-05		Male	54		Lung	ZCH	adenocarcinoma						CSV	0
2017-08-05		Female	74		Healthy	SRR							CSV	1
2017-08-05		Female	42		Healthy	SRR							EpCAM	0
2017-08-06		Female	54		Breast	SAH	ductal						EpCAM	0
2017-08-06		Female	41		Cervical	SRR							CSV	3
2017-08-06		Male	38		Stomach (gastric)	SRR							EpCAM	2
2017-08-06		Male	47		Colorectal	SAH							CSV	1
2017-08-06		Male	57		Lung	ZCH							CSV	2
2017-08-08		Female	57		HNSCC	ZCH	nonkeratinized squamous cell carcinoma	T4N2M0	IVA				CSV	4
2017-08-08		Female	43		Cervical	SRR							EpCAM	2
2017-08-08		Male	60		Lung	SAH							CSV	1
2017-08-08		Male	24		Colorectal	ZCH							EpCAM	0
2017-08-09		Female	30		HNSCC	SAH	squamous cell carcinoma						EpCAM	0
2017-08-09		Female	37		HNSCC	ZCH							EpCAM	0
2017-08-10		Female	42		Cervical	SRR	squamous cell carcinoma						CSV	3
2017-08-10		Male	58		Sacroma	SRR							CSV	2
2017-08-10		Male	72		Esophageal	SAH							CSV	0
2017-08-12		Male	46		Pancreas (PDAS)	SAH							CSV	0
2017-08-13		Female	71		Lung	ZCH		T1N3M1c	ⅣB				CSV	2
2017-08-13		Female	67		Bladder	ZCH							CSV	2
2017-08-14		Female	32		HNSCC	SAH		cT3N2M0	Ⅲ				CSV	3
2017-08-14		Female	60		Cervical	SAH	squamous cell carcinoma		IIB				CSV	1
2017-08-14		Male	72		Bladder	ZCH		T3bN2M0					CSV	1
2017-08-14		Male	57		Lung	ZCH							CSV	3
2017-08-14		Male	67		Colorectal	ZCH							CSV	3
2017-08-14		Male	67		Colorectal	ZCH							EpCAM	0
2017-08-14		Male	60		Colorectal	ZCH							EpCAM	2
2017-08-15		Female	63		Colorectal	ZCH		pT1N0M0	ⅠA				EpCAM	4
2017-08-15		Female	60		Breast	SRR	ductal						EpCAM	2
2017-08-15		Female	81		Esophageal	SAH	squamous cell carcinoma						EpCAM	3
2017-08-15		Female	63		Cervical	SRR							EpCAM	2
2017-08-15		Female	63		Cervical	SRR							CSV	2
2017-08-15		Male	60		Stomach (gastric)	SRR							CSV	2
2017-08-15		Female	36		Breast	SAH							EpCAM	6
2017-08-15		Male	63		Stomach (gastric)	SAH							CSV	4
2017-08-15		Female	41		Hepatocarcinoma	ZCH							CSV	2
2017-08-16		Female	47		Cervical	SRR	squamous cell carcinoma		IB				CSV	3
2017-08-16		Male	54		HNSCC	ZCH	nonkeratinized squamous cell carcinoma	T2N2M0	III				EpCAM	8
2017-08-16		Female	58		Breast	SRR							EpCAM	1
2017-08-16		Male	46		HNSCC	SAH							CSV	5
2017-08-16		Male	71		Lung	ZCH							CSV	0
2017-08-17		Female	59		Ovary	SRR			IIIC				CSV	7
2017-08-19		Female	48		Cervical	SAH			III				CSV	3
2017-08-20		Male	57		Lung	SRR		pT2aN0M0	ⅠB				EpCAM	0
2017-08-20		Female	60		Breast	SRR	ductal	T1cN3cM0	Ⅲ				EpCAM	3
2017-08-20		Male	63		Pancreas (PDAS)	SAH	adenocarcinoma		Ⅳ				EpCAM	0
2017-08-20		Female	36		Breast	ZCH	ductal	T3N2M1	IV				CSV	7
2017-08-20		Female	59		Ovary	SRR							CSV	0
2017-08-20		Male	63		Stomach (gastric)	SAH							CSV	4
2017-08-20		Male	63		Brain (Glioma)	ZCH							CSV	1
2017-08-21		Male	63		Prostate	SAH							EpCAM	0
2017-08-21		Female	57		Pancreas (PDAS)	SAH							CSV	2
2017-08-21		Male	70		Hepatocarcinoma	ZCH							CSV	0
2017-08-21		Male	59		Prostate	ZCH							EpCAM	0
2017-08-21		Female	71		Esophageal	ZCH							CSV	0
2017-08-21		Female	60		Stomach (gastric)	ZCH							EpCAM	0
2017-08-22		Male	70		Colorectal	ZCH		cT4bN2M0	ⅢC				EpCAM	3
2017-08-22		Female	46		Breast	ZCH	ductal	T3N2M1	IV				CSV	3
2017-08-22		Female	49		Breast	SRR							EpCAM	3
2017-08-22		Female	36		Healthy	ZCH							CSV	0
2017-08-22		Male	50		Stomach (gastric)	ZCH							CSV	3
2017-08-22		Female	52		Brain (Glioma)	ZCH							CSV	4
2017-08-23		Male	59		Prostate	SAH	adenocarcinoma	pT3bN1M0					CSV	11
2017-08-23		Female	71		Pancreas (PDAS)	SAH							CSV	14
2017-08-23		Female	46		Breast	ZCH							EpCAM	1
2017-08-23		Female	62		Stomach (gastric)	ZCH							CSV	0
2017-08-23		Female	65		Colorectal	ZCH							CSV	0
2017-08-26		Female	30		HNSCC	ZCH							CSV	3
2017-08-26		Male	55		Healthy	ZCH							CSV	0
2017-08-26		Male	63		Brain (Glioma)	ZCH							CSV	2
2017-08-27		Male	54		Healthy	SRR							CSV	0
2017-08-27		Female	54		Colorectal	ZCH							CSV	0
2017-08-28		Female	78		Breast	SRR							EpCAM	0
2017-08-28		Male	50		Colorectal	SAH		T3N1aM0					CSV	0
2017-08-28		Male	55		Colorectal	SAH		T3aN2					CSV	2
2017-08-28		Female	54		Stomach (gastric)	ZCH							EpCAM	0
2017-08-28		Male	44		Colorectal	ZCH		cT2N2M1					CSV	0
2017-08-29		Female	49		Breast	ZCH	ductal	pT4bNxM1	Ⅳ				EpCAM	2
2017-08-29		Female	63		Ovary	SRR	mucous	cT3cN1M1	IV				CSV	1
2017-08-29		Female	63		Ovary	SRR	mucous	cT3cN1M1	IV				EpCAM	1
2017-08-29		Female	46		Healthy	SRR							CSV	0
2017-08-29		Female	60		Breast	SRR							EpCAM	9
2017-08-29		Female	60		Breast	SRR							CSV	6
2017-08-29		Male	64		Lung	SAH							CSV	2
2017-08-29		Male	58		Lung	ZCH							CSV	0
2017-08-29		Female	68		Lung	ZCH							EpCAM	0
2017-08-29		Female	68		Lung	ZCH							CSV	3
2017-08-30		Female	53		Breast	SAH	ductal	pTisN0M0	0				CSV	2
2017-08-30		Female	66		Breast	ZCH							EpCAM	6
2017-08-30		Female	52		Brain (Glioma)	ZCH							CSV	0
2017-08-31		Female	45		Lung	SAH							CSV	2
2017-09-02		Female	57		Breast	SAH	ductal						CSV	3
2017-09-02		Male	60		Pancreas (PDAS)	SAH							CSV	0
2017-09-02		Male	64		Colorectal	SAH							EpCAM	2
2017-09-02		Male	61		Stomach (gastric)	ZCH							CSV	6
2017-09-03		Male	56		Stomach (gastric)	ZCH	adenocarcinoma						EpCAM	0
2017-09-03		Male	54		Esophageal	SRR		T3N2M0					CSV	1
2017-09-03		Male	58		Lung	SAH							CSV	3
2017-09-03		Male	67		Bladder	ZCH							CSV	2
2017-09-04		Female	63		Breast	ZCH	Mucous	pT2N0M0	ⅡA				EpCAM	1
2017-09-04		Male	57		Healthy	SRR							EpCAM	0
2017-09-04		Male	71		Pancreas (PDAS)	SAH							EpCAM	0
2017-09-04		Female	60		Pancreas (PDAS)	SAH							CSV	4
2017-09-04		Male	52		Lung	ZCH							CSV	2
2017-09-04		Male	40		Brain (Glioma)	ZCH							CSV	4
2017-09-05		Female	69		Lung	ZCH		pT1bN0M0	ⅠA				CSV	4
2017-09-05		Female	50		Lung	ZCH		cT1N3M1	Ⅳ				CSV	0
2017-09-05		Female	61		Breast	ZCH							CSV	2
2017-09-05		Female	60		Colorectal	ZCH							EpCAM	4
2017-09-05		Female	60		Colorectal	ZCH							CSV	2
2017-09-06		Female	61		Lung	SAH							CSV	0
2017-09-06		Male	61		Prostate	SAH							CSV	7
2017-09-06		Female	40		Brain (Glioma)	ZCH							CSV	3
2017-09-07		Female	62		Esophageal	SAH	squamous cell carcinoma						CSV	4
2017-09-09		Female	77		Pancreas (PDAS)	SAH							EpCAM	2
2017-09-09		Female	81		Bladder	ZCH							CSV	3
2017-09-10		Female	61		HNSCC	SAH		T3N2M0	III				CSV	2
2017-09-10		Female	64		Lung	SRR							CSV	2
2017-09-10		Female	42		Cervical	SRR							EpCAM	3
2017-09-10		Female	46		Lung	SAH							EpCAM	0
2017-09-11		Female	57		Cervical	SRR							EpCAM	2
2017-09-11		Male	51		Healthy	SRR							CSV	0
2017-09-11		Female	53		Cervical	SRR							CSV	1
2017-09-11		Female	53		Cervical	SRR							EpCAM	5
2017-09-11		Female	56		Lung	SAH							CSV	2
2017-09-11		Male	86		Colorectal	ZCH		T3N2M1					EpCAM	0
2017-09-12		Female	49		HNSCC	SAH	nonkeratinized squamous cell carcinoma	T1N0M0	I				EpCAM	0
2017-09-12		Female	65		Lung	SAH							CSV	3
2017-09-12		Female	69		Hepatocarcinoma	ZCH							CSV	6
2017-09-16		Male	65		Lung	SAH							CSV	6
2017-09-16		Male	83		Stomach (gastric)	ZCH							CSV	1
2017-09-16		Male	83		Stomach (gastric)	ZCH							EpCAM	0
2017-09-17		Male	74		Stomach (gastric)	ZCH	squamous cell carcinoma	pT1N0M0	IA				EpCAM	0
2017-09-17		Female	71		Breast	SAH	ductal		II级				EpCAM	4
2017-09-17		Male	25		Stomach (gastric)	SAH							EpCAM	1
2017-09-18		Male	46		HNSCC	ZCH	squamous cell carcinoma	Pt2an1m0					CSV	4
2017-09-18		Female	47		Cervical	SRR							EpCAM	0
2017-09-18		Female	58		Colorectal	SAH							EpCAM	5
2017-09-18		Male	61		Lung	ZCH							EpCAM	0
2017-09-19		Male	58		Stomach (gastric)	ZCH	adenocarcinoma						CSV	6
2017-09-19		Female	62		Ovary	SAH							CSV	4
2017-09-19		Female	74		Pancreas (PDAS)	SAH							EpCAM	0
2017-09-19		Female	46		Stomach (gastric)	SAH							EpCAM	4
2017-09-19		Male	49		Lung	ZCH							CSV	2
2017-09-19		Male	59		Prostate	ZCH							EpCAM	1
2017-09-19		Male	28		Colorectal	ZCH							EpCAM	8
2017-09-20		Female	68		Stomach (gastric)	SRR	adenocarcinoma	结直肠癌pT4N2bM0	IIIc				EpCAM	4
2017-09-20		Female	68		Stomach (gastric)	SRR	adenocarcinoma	结直肠癌pT4N2bM0	IIIc				CSV	2
2017-09-20		Male	35		Pancreas (PDAS)	SAH							EpCAM	0
2017-09-20		Female	63		Colorectal	ZCH							CSV	2
2017-09-23		Female	65		Bladder	ZCH							CSV	1
2017-09-24		Female	52		Breast	SAH	Mucous	pT1N0M0	ⅠA				EpCAM	3
2017-09-24		Female	62		Healthy	SRR							EpCAM	0
2017-09-24		Male	53		Prostate	SRR							EpCAM	1
2017-09-24		Female	74		Lung	ZCH							CSV	4
2017-09-24		Female	74		Lung	ZCH							EpCAM	0
2017-09-24		Female	53		HNSCC	ZCH							CSV	4
2017-09-24		Male	52		Hepatocarcinoma	ZCH							CSV	4
2017-09-24		Male	52		Hepatocarcinoma	ZCH							EpCAM	5
2017-09-24		Male	57		Stomach (gastric)	ZCH							EpCAM	1
2017-09-24		Male	53		Stomach (gastric)	ZCH							EpCAM	13
2017-09-24		Male	26		Brain (Glioma)	ZCH							CSV	4
2017-09-25		Female	51		Breast	SAH	ductal	pT2N0M0	IIA				EpCAM	6
2017-09-25		Female	54		Breast	SRR			IV				EpCAM	2
2017-09-25		Female	60		Breast	SRR	ductal	pT4N3M1					EpCAM	3
2017-09-25		Female	60		Breast	SRR							EpCAM	0
2017-09-25		Female	60		Breast	SRR							CSV	1
2017-09-25		Female	54		Lung	ZCH							CSV	14
2017-09-25		Female	52		Brain (Glioma)	ZCH							CSV	4
2017-09-26		Female	66		Lung	SAH							CSV	1
2017-09-27		Male	71		Hepatocarcinoma	SRR							CSV	2
2017-09-27		Male	59		Prostate	SAH							CSV	0
2017-09-27		Female	66		Stomach (gastric)	SAH							CSV	2
2017-09-27		Female	67		Colorectal	SAH							CSV	4
2017-09-27		Male	59		Hepatocarcinoma	ZCH							CSV	5
2017-09-27		Female	71		Hepatocarcinoma	ZCH							CSV	14
2017-09-27		Female	43		Brain (Glioma)	ZCH							CSV	6
2017-09-29		Female	62		Breast	SRR		pT1cN0M0	ⅠA				EpCAM	2
2017-09-29		Female	49		Breast	SRR	ductal	T2N0M0	ⅡA				CSV	7
2017-09-29		Female	57		Breast	SRR							EpCAM	4
2017-09-30		Male	55		Lung	ZCH							CSV	0
2017-09-30		Female	36		Healthy	SRR							CSV	0
2017-09-30		Female	64		Healthy	SRR							CSV	0
2017-09-30		Female	65		Stomach (gastric)	SAH							EpCAM	5
2017-09-30		Male	60		Hepatocarcinoma	ZCH							CSV	2
2017-09-30		Male	53		Stomach (gastric)	ZCH							EpCAM	4
2017-10-08		Female	47		Sacroma	SRR		T2N0M0	Ⅲ				CSV	0
2017-10-08		Female	58		Breast	SRR							EpCAM	0
2017-10-08		Male	83		Stomach (gastric)	SRR							CSV	6
2017-10-08		Female	57		Lung	SAH							EpCAM	0
2017-10-08		Female	81		Esophageal	SAH							EpCAM	0
2017-10-08		Female	81		Esophageal	SAH							CSV	1
2017-10-08		Female	55		Pancreas (PDAS)	SAH							EpCAM	3
2017-10-08		Male	80		Colorectal	SAH							CSV	0
2017-10-08		Male	57		Lung	ZCH							CSV	1
2017-10-08		Female	52		Breast	ZCH							CSV	7
2017-10-08		Male	42		Colorectal	ZCH							EpCAM	0
2017-10-08		Male	42		Colorectal	ZCH							CSV	2
2017-10-09		Female	58		Breast	SRR	ductal	pT1NOMO	ⅠA				EpCAM	4
2017-10-09		Female	46		Colorectal	ZCH		pT1N0M0	Ⅰ				EpCAM	1
2017-10-09		Female	58		Sacroma	SRR		T4N3M1					CSV	2
2017-10-09		Female	52		Healthy	SAH							CSV	0
2017-10-09		Male	42		Pancreas (PDAS)	SAH							EpCAM	2
2017-10-09		Male	71		Pancreas (PDAS)	SAH							EpCAM	0
2017-10-09		Female	54		Pancreas (PDAS)	SAH							CSV	4
2017-10-10		Male	60		Lung	SRR							CSV	2
2017-10-10		Female	49		Lung	SRR							EpCAM	4
2017-10-10		Female	49		Lung	SRR							CSV	2
2017-10-10		Male	49		Prostate	SAH							EpCAM	0
2017-10-10		Male	75		Stomach (gastric)	SAH							EpCAM	0
2017-10-10		Male	66		Lung	ZCH							CSV	13
2017-10-10		Male	66		Lung	ZCH							EpCAM	12
2017-10-11		Female	48		Breast	SRR							CSV	0
2017-10-11		Female	61		HNSCC	ZCH							EpCAM	36
2017-10-12		Female	49		HNSCC	ZCH		T3N2M0	III				EpCAM	6
2017-10-12		Female	71		Lung	SAH							CSV	11
2017-10-12		Female	71		Lung	SAH							EpCAM	7
2017-10-12		Female	67		Lung	SAH							CSV	22
2017-10-14		Male	52		Lung	ZCH		cT1cN0M0;Ct2n0m0	ⅠA3				EpCAM	3
2017-10-14		Female	60		Pancreas (PDAS)	SAH							CSV	4
2017-10-14		Female	60		Pancreas (PDAS)	SAH							EpCAM	1
2017-10-14		Female	54		Pancreas (PDAS)	SAH							EpCAM	3
2017-10-14		Female	54		Pancreas (PDAS)	SAH							CSV	11
2017-10-14		Female	68		Colorectal	ZCH							EpCAM	14
2017-10-15		Female	55		Breast	ZCH		pT1N0M0	ⅠA				EpCAM	1
2017-10-15		Female	67		Breast	SRR	ductal	pT1N0M0	I				EpCAM	15
2017-10-15		Female	65		Stomach (gastric)	ZCH	adenocarcinoma						CSV	0
2017-10-15		Female	60		Breast	SRR	ductal	cT2N2Mx					EpCAM	5
2017-10-15		Female	60		Breast	SRR	ductal	cT2N2Mx					CSV	6
2017-10-15		Male	61		Lung	SAH							CSV	1
2017-10-15		Male	52		HNSCC	SAH							CSV	12
2017-10-15		Female	57		Healthy	SAH							CSV	1
2017-10-15		Female	57		Healthy	SAH							CSV	0
2017-10-15		Female	72		Stomach (gastric)	SAH							CSV	6
2017-10-15		Male	74		Pancreas (PDAS)	ZCH							CSV	3
2017-10-15		Male	74		Pancreas (PDAS)	ZCH							EpCAM	0
2017-10-15		Male	58		Colorectal	ZCH							CSV	9
2017-10-15		Female	54		Colorectal	ZCH							EpCAM	1
2017-10-15		Male	63		Brain (Glioma)	ZCH							CSV	2
2017-10-15		Female	45		Brain (Glioma)	ZCH							CSV	1
2017-10-16		Female	55		Breast	SRR		T2aN2M1	ⅣB				EpCAM	4
2017-10-16		Male	60		Lung	SAH							EpCAM	5
2017-10-16		Male	60		Lung	SAH							CSV	5
2017-10-16		Male	68		Stomach (gastric)	ZCH							EpCAM	1
2017-10-16		Male	68		Stomach (gastric)	ZCH							CSV	5
2017-10-17		Male	64		Lung	SRR							CSV	6
2017-10-17		Female	44		Cervical	SRR							EpCAM	0
2017-10-17		Female	53		Healthy	SRR							CSV	0
2017-10-18		Male	72		Colorectal	SAH	adenocarcinoma						CSV	2
2017-10-18		Female	85		Sacroma	SRR							CSV	3
2017-10-18		Male	51		HNSCC	ZCH		T2N2M0					CSV	0
2017-10-18		Female	62		Esophageal	ZCH							EpCAM	1
2017-10-19		Female	54		Pancreas (PDAS)	SAH							CSV	0
2017-10-19		Female	62		Esophageal	ZCH							CSV	0
2017-10-19		Female	55		Colorectal	ZCH							CSV	1
2017-10-21		Male	59		Healthy	SRR							CSV	0
2017-10-21		Female	58		Breast	SRR							CSV	1
2017-10-21		Female	44		Pancreas (PDAS)	SAH							EpCAM	0
2017-10-21		Male	35		Pancreas (PDAS)	SAH							EpCAM	0
2017-10-21		Male	35		Pancreas (PDAS)	SAH							CSV	7
2017-10-21		Male	62		Healthy	ZCH							CSV	0
2017-10-22		Female	53		Lung	SRR		T1N0M0	ⅠA				EpCAM	0
2017-10-22		Female	65		Lung	ZCH		T4N2M1	Ⅳ				EpCAM	0
2017-10-22		Female	35		Lung	SAH							CSV	0
2017-10-22		Female	35		Lung	SAH							EpCAM	0
2017-10-22		Male	84		Hepatocarcinoma	SAH							CSV	6
2017-10-22		Male	60		Healthy	SAH							CSV	0
2017-10-22		Male	58		Pancreas (PDAS)	SAH							CSV	1
2017-10-22		Male	58		Pancreas (PDAS)	SAH							EpCAM	2
2017-10-22		Female	65		Lung	ZCH							CSV	4
2017-10-22		Female	65		Lung	ZCH							EpCAM	2
2017-10-23		Female	64		Colorectal	ZCH		pT1N0M0	Ⅰ				EpCAM	1
2017-10-23		Male	50		Healthy	SRR							CSV	0
2017-10-25		Female	74		Breast	ZCH	ductal	pT1N0(sn)M0	ⅠA				CSV	8
2017-10-25		Female	47		Cervical	SRR	squamous cell carcinoma	T1N1M0	IIIB				EpCAM	4
2017-10-25		Female	53		Cervical	SRR							CSV	0
2017-10-25		Female	47		Cervical	SRR							CSV	1
2017-10-25		Male	62		Lung	SAH							CSV	3
2017-10-25		Male	62		Lung	SAH							EpCAM	18
2017-10-25		Female	67		Esophageal	ZCH							EpCAM	0
2017-10-26		Female	42		Cervical	ZCH	squamous cell carcinoma		IIIC2				EpCAM	0
2017-10-26		Female	42		HNSCC	SRR		T2N2M0	III				EpCAM	4
2017-10-26		Female	59		Colorectal	SAH							CSV	2
2017-10-26		Female	59		Colorectal	SAH							EpCAM	12
2017-10-26		Male	50		Lung	ZCH							EpCAM	0
2017-10-26		Male	50		Lung	ZCH							CSV	3
2017-10-28		Male	48		HNSCC	SAH	nonkeratinized squamous cell carcinoma	T4N1M0	IVA				CSV	6
2017-10-29		Female	57		Cervical	SRR							CSV	6
2017-10-29		Female	57		Stomach (gastric)	SAH							EpCAM	3
2017-10-29		Female	57		Stomach (gastric)	SAH							CSV	1
2017-10-29		Female	50		Stomach (gastric)	ZCH							EpCAM	0
2017-10-29		Female	50		Stomach (gastric)	ZCH							CSV	4
2017-10-29		Male	69		Colorectal	ZCH							EpCAM	7
2017-10-30		Male	66		Colorectal	SAH			ⅣA				EpCAM	0
2017-10-30		Male	66		Colorectal	SAH			ⅣA				CSV	3
2017-10-30		Male	65		Lung	SAH							EpCAM	0
2017-10-30		Male	58		Lung	ZCH							CSV	2
2017-10-30		Male	72		Prostate	ZCH							EpCAM	1
2017-10-30		Female	52		Breast	ZCH		T1					CSV	0
2017-10-30		Male	72		Stomach (gastric)	ZCH							CSV	8
2017-10-31		Female	50		Lung	ZCH		pT1aN0M0	ⅠA				CSV	22
2017-10-31		Female	50		Lung	ZCH		pT1aN0M0	ⅠA				EpCAM	18
2017-10-31		Male	48		HNSCC	ZCH	nonkeratinized squamous cell carcinoma	T2N1M0	II				CSV	0
2017-10-31		Male	56		Prostate	SAH			IV				EpCAM	3
2017-10-31		Male	50		Stomach (gastric)	ZCH	adenocarcinoma						CSV	0
2017-10-31		Female	44		Cervical	SRR							CSV	0
2017-10-31		Female	53		Cervical	SRR							EpCAM	0
2017-10-31		Female	47		Healthy	SRR							EpCAM	0
2017-10-31		Female	52		Pancreas (PDAS)	SAH							CSV	18
2017-10-31		Female	63		Esophageal	ZCH		pT3N3M0					EpCAM	7
2017-10-31		Female	66		Stomach (gastric)	ZCH							CSV	0
2017-11-01		Female	44		Cervical	SRR							EpCAM	8
2017-11-01		Male	62		Esophageal	SAH							EpCAM	0
2017-11-01		Female	60		Lung	ZCH							CSV	0
2017-11-02		Male	57		Sacroma	SAH							CSV	3
2017-11-02		Male	57		Sacroma	SAH							EpCAM	0
2017-11-02		Male	77		Lung	ZCH							CSV	2
2017-11-04		Female	55		Lung	ZCH							CSV	0
2017-11-05		Female	65		Breast	SRR							CSV	4
2017-11-05		Male	66		Lung	SAH							CSV	2
2017-11-06		Male	63		Stomach (gastric)	SAH	adenocarcinoma	pT4bN3bM1c	ⅣC				CSV	0
2017-11-06		Male	49		Healthy	SRR							CSV	0
2017-11-06		Female	69		Lung	SAH		pT3cN2M1a Ⅳa					EpCAM	2
2017-11-06		Female	57		Breast	ZCH							EpCAM	8
2017-11-07		Male	66		Lung	ZCH	adenocarcinoma	pT2N2M0	ⅢA				EpCAM	0
2017-11-07		Male	58		Lung	SAH		pT2aN2M0	ⅢA				CSV	2
2017-11-07		Male	36		Colorectal	SAH	adenocarcinoma	T3N2bM0	ⅢC				CSV	0
2017-11-07		Female	50		Sacroma	SAH			I				CSV	1
2017-11-07		Female	74		Breast	SAH							CSV	4
2017-11-07		Female	44		Cervical	SRR							CSV	2
2017-11-07		Female	44		Cervical	SRR							EpCAM	0
2017-11-07		Male	44		Pancreas (PDAS)	SAH							CSV	4
2017-11-07		Male	63		HNSCC	ZCH		T4N2M0					CSV	0
2017-11-07		Male	47		Pancreas (PDAS)	ZCH							CSV	0
2017-11-08		Female	68		Healthy	SRR							EpCAM	1
2017-11-08		Male	54		Pancreas (PDAS)	SRR							CSV	0
2017-11-08		Male	50		Pancreas (PDAS)	SAH							EpCAM	3
2017-11-08		Male	50		Pancreas (PDAS)	SAH							CSV	2
2017-11-08		Female	66		Breast	ZCH							EpCAM	2
2017-11-08		Male	74		Stomach (gastric)	ZCH							CSV	0
2017-11-08		Female	74		Stomach (gastric)	ZCH							CSV	0
2017-11-09		Female	34		Breast	ZCH	ductal	Pt1n0m0	I				EpCAM	2
2017-11-11		Female	64		Colorectal	SRR							CSV	5
2017-11-11		Female	64		Colorectal	SRR							EpCAM	11
2017-11-12		Female	71		Lung	SRR							EpCAM	5
2017-11-12		Female	71		Lung	SRR							CSV	3
2017-11-12		Female	49		Healthy	SRR							EpCAM	0
2017-11-12		Male	46		Lung	SAH							CSV	5
2017-11-12		Male	46		Lung	SAH							EpCAM	0
2017-11-12		Female	51		Hepatocarcinoma	SAH							CSV	3
2017-11-12		Male	55		Pancreas (PDAS)	SAH							CSV	3
2017-11-12		Male	66		Colorectal	SAH							EpCAM	2
2017-11-12		Male	66		Colorectal	SAH							CSV	0
2017-11-12		Male	68		Colorectal	ZCH							EpCAM	7
2017-11-13		Male	54		Lung	ZCH							CSV	1
2017-11-13		Female	60		Colorectal	ZCH							CSV	0
2017-11-14		Male	64		HNSCC	SAH	nonkeratinized squamous cell carcinoma	T1N1M0	II				CSV	0
2017-11-14		Male	51		Brain (Glioma)	SAH							CSV	1
2017-11-14		Female	67		Lung	ZCH							CSV	0
2017-11-14		Female	68		Colorectal	ZCH							EpCAM	2
2017-11-14		Male	51		Brain (Glioma)	ZCH							CSV	3
2017-11-15		Male	18		HNSCC	SAH	nonkeratinized squamous cell carcinoma	cT4N2M0	Ⅳa				CSV	5
2017-11-15		Male	46		Healthy	SRR							CSV	0
2017-11-15		Male	42		Pancreas (PDAS)	SAH							EpCAM	0
2017-11-15		Male	42		Pancreas (PDAS)	SAH							CSV	3
2017-11-15		Female	58		Stomach (gastric)	SAH							CSV	0
2017-11-15		Female	70		Colorectal	SAH							CSV	0
2017-11-15		Female	41		Cervical	ZCH							EpCAM	7
2017-11-16		Female	55		Pancreas (PDAS)	SAH							EpCAM	0
2017-11-16		Female	55		Pancreas (PDAS)	SAH							CSV	7
2017-11-16		Female	66		Lung	ZCH							CSV	5
2017-11-16		Female	66		Lung	ZCH							EpCAM	5
2017-11-18		Female	57		Cervical	ZCH	squamous cell carcinoma		IIIC1r				CSV	4
2017-11-18		Female	57		Cervical	ZCH	squamous cell carcinoma		IIIC1r				EpCAM	1
2017-11-19		Male	24		Sacroma	SRR							EpCAM	0
2017-11-19		Female	44		Cervical	SRR							CSV	7
2017-11-19		Male	79		Healthy	SRR							CSV	0
2017-11-19		Male	59		Esophageal	ZCH							CSV	0
2017-11-19		Female	65		Stomach (gastric)	ZCH							CSV	0
2017-11-19		Female	55		Stomach (gastric)	ZCH							EpCAM	0
2017-11-19		Male	73		Colorectal	ZCH							EpCAM	5
2017-11-20		Male	44		Healthy	SRR							CSV	0
2017-11-20		Male	38		Lung	SAH							CSV	0
2017-11-20		Male	70		Colorectal	SAH							CSV	3
2017-11-20		Female	68		Esophageal	ZCH		T2N0M0					CSV	1
2017-11-21		Female	64		Stomach (gastric)	ZCH	adenocarcinoma						CSV	0
2017-11-21		Female	46		Cervical	SRR							CSV	2
2017-11-21		Female	46		Cervical	SRR							EpCAM	1
2017-11-21		Female	66		Breast	SRR		T2N1M0					EpCAM	0
2017-11-21		Female	66		Breast	SRR		T2N1M0					CSV	0
2017-11-21		Female	67		Bladder	ZCH							CSV	0
2017-11-22		Female	37		HNSCC	ZCH		T4N2M0	IVA				EpCAM	2
2017-11-22		Female	43		Breast	SRR	ductal	T2N1M0					CSV	4
2017-11-22		Female	64		Breast	SRR							EpCAM	6
2017-11-22		Female	64		Breast	SRR							CSV	10
2017-11-22		Male	49		Lung	SAH							CSV	0
2017-11-22		Female	60		Stomach (gastric)	ZCH							CSV	0
2017-11-23		Female	57		Stomach (gastric)	ZCH		pT4N3M0	ⅢC				CSV	2
2017-11-23		Male	15		Brain (Glioma)	SAH			WHO IV				CSV	6
2017-11-23		Female	46		Sacroma	SRR		T2N0M0					CSV	6
2017-11-23		Female	65		Stomach (gastric)	ZCH							EpCAM	0
2017-11-23		Female	65		Stomach (gastric)	ZCH							CSV	1
2017-11-25		Female	37		HNSCC	ZCH	adenoid cystic carcinoma						EpCAM	0
2017-11-25		Male	65		Prostate	ZCH							EpCAM	1
2017-11-25		Female	51		Cervical	SRR							CSV	0
2017-11-25		Male	63		Colorectal	SRR							CSV	3
2017-11-25		Female	66		Lung	ZCH							EpCAM	20
2017-11-25		Female	66		Lung	ZCH							CSV	22
2017-11-26		Male	54		HNSCC	SAH	nonkeratinized squamous cell carcinoma	T2N1M0	II				CSV	8
2017-11-26		Male	59		Healthy	SRR							EpCAM	0
2017-11-26		Male	54		Lung	SAH							CSV	2
2017-11-26		Male	54		Lung	SAH							EpCAM	1
2017-11-26		Male	58		Prostate	ZCH							EpCAM	8
2017-11-27		Male	65		Stomach (gastric)	ZCH		pT3N0M0；pT1N0M0	ⅡA				CSV	1
2017-11-27		Female	49		Lung	ZCH							CSV	4
2017-11-28		Male	59		Healthy	SRR							CSV	0
2017-11-28		Male	60		Pancreas (PDAS)	SAH							EpCAM	0
2017-11-28		Male	71		Colorectal	SAH		T3N1aM0					CSV	0
2017-11-29		Male	48		Lung	ZCH		T1bN2M0	ⅢA				CSV	5
2017-11-29		Female	48		Stomach (gastric)	SAH	adenocarcinoma	T3N2bM0	ⅢC				CSV	0
2017-11-29		Female	44		HNSCC	ZCH	nonkeratinized squamous cell carcinoma	T3N2M1					CSV	0
2017-11-29		Female	67		Ovary	SRR		T4N2M1					EpCAM	0
2017-11-29		Male	24		Sacroma	SRR							CSV	5
2017-11-29		Female	72		Lung	SAH							CSV	2
2017-11-30		Female	77		Breast	SRR		Pt2n2m0	IIIA				EpCAM	12
2017-11-30		Female	74		Cervical	SAH							CSV	0
2017-11-30		Male	57		Prostate	SAH		pT3bN1M0					CSV	0
2017-11-30		Female	67		Healthy	ZCH							CSV	0
2017-12-02		Male	55		HNSCC	SAH	nonkeratinized squamous cell carcinoma	T3N2M1	IVB				CSV	4
2017-12-02		Male	60		Stomach (gastric)	ZCH	adenocarcinoma						CSV	3
2017-12-02		Male	58		Healthy	ZCH							EpCAM	0
2017-12-03		Female	62		Ovary	SRR	mucous	T2N3M1					CSV	2
2017-12-03		Female	62		Ovary	SRR							CSV	5
2017-12-03		Female	47		Healthy	SRR							CSV	1
2017-12-03		Male	84		Bladder	ZCH							CSV	3
2017-12-03		Female	72		Breast	ZCH		T2N2M0					CSV	2
2017-12-03		Female	56		Colorectal	ZCH							EpCAM	1
2017-12-04		Male	60		Healthy	SRR							EpCAM	0
2017-12-04		Female	58		Pancreas (PDAS)	SAH							CSV	2
2017-12-04		Female	58		Pancreas (PDAS)	SAH							EpCAM	0
2017-12-04		Female	59		Breast	ZCH							CSV	3
2017-12-05		Male	35		Lung	SAH							CSV	14
2017-12-05		Male	35		Lung	SAH							EpCAM	11
2017-12-05		Male	67		Colorectal	ZCH							EpCAM	3
2017-12-06		Female	62		Breast	SRR							CSV	2
2017-12-06		Female	59		Pancreas (PDAS)	SAH							CSV	8
2017-12-06		Female	59		Pancreas (PDAS)	SAH							EpCAM	0
2017-12-07		Female	67		Breast	SRR		T2N1M0					CSV	0
2017-12-07		Female	38		Colorectal	ZCH							EpCAM	3
2017-12-09		Female	46		Lung	SAH	adenocarcinoma	cT4N1M1	IVA				EpCAM	6
2017-12-09		Female	48		Cervical	SRR							CSV	4
2017-12-09		Male	56		HNSCC	ZCH							EpCAM	0
2017-12-09		Female	64		Colorectal	ZCH							EpCAM	0
2017-12-09		Female	67		Colorectal	ZCH							EpCAM	5
2017-12-09		Female	49		Colorectal	ZCH							EpCAM	5
2017-12-10		Female	62		HNSCC	SAH		T2N1M0	II				EpCAM	5
2017-12-10		Female	47		Breast	ZCH	ductal						CSV	0
2017-12-10		Male	69		Colorectal	SAH							CSV	6
2017-12-11		Male	51		HNSCC	SRR	squamous cell carcinoma						CSV	0
2017-12-11		Female	46		Cervical	SRR							EpCAM	9
2017-12-11		Female	46		Cervical	SRR							CSV	2
2017-12-11		Male	60		Prostate	SRR							EpCAM	3
2017-12-11		Female	47		Breast	SRR							CSV	3
2017-12-11		Female	64		Lung	SAH							EpCAM	0
2017-12-11		Male	62		HNSCC	SAH							EpCAM	13
2017-12-11		Male	61		Colorectal	SAH							EpCAM	4
2017-12-11		Male	48		Lung	ZCH							CSV	4
2017-12-11		Male	61		Stomach (gastric)	ZCH							EpCAM	0
2017-12-11		Male	56		Colorectal	ZCH							EpCAM	1
2017-12-12		Male	53		Lung	SAH	adenocarcinoma	pT2aN0M0	ⅡB				CSV	0
2017-12-12		Female	68		Colorectal	SRR	adenocarcinoma	pT2N1bM0	ⅢA				CSV	3
2017-12-12		Female	42		Cervical	SRR	squamous cell carcinoma	Pt2n0m0	IIA1				EpCAM	3
2017-12-12		Male	40		Healthy	SRR							CSV	0
2017-12-12		Male	53		Hepatocarcinoma	SAH							CSV	0
2017-12-12		Male	56		Prostate	SAH							CSV	1
2017-12-12		Male	49		Prostate	SAH							EpCAM	0
2017-12-12		Male	54		Pancreas (PDAS)	SAH							EpCAM	3
2017-12-12		Male	54		Pancreas (PDAS)	SAH							CSV	11
2017-12-12		Male	49		Healthy	ZCH							CSV	0
2017-12-12		Female	77		Esophageal	ZCH							CSV	7
2017-12-12		Female	68		Stomach (gastric)	ZCH							EpCAM	5
2017-12-12		Female	68		Stomach (gastric)	ZCH							CSV	4
2017-12-13		Male	60		Esophageal	ZCH	keratinized	cT4NXM0					EpCAM	0
2017-12-13		Female	81		HNSCC	SAH		T1N3M1					CSV	5
2017-12-13		Male	51		Healthy	SAH							CSV	0
2017-12-13		Male	57		Healthy	SAH							CSV	0
2017-12-14		Male	58		Colorectal	SAH							CSV	0
2017-12-16		Female	46		Healthy	SRR							EpCAM	0
2017-12-16		Female	74		Breast	SRR							EpCAM	4
2017-12-16		Female	74		Breast	SRR							CSV	0
2017-12-17		Female	54		Stomach (gastric)	ZCH	adenocarcinoma	T4aN3bM1c	ⅣC				CSV	7
2017-12-17		Male	60		HNSCC	ZCH							CSV	0
2017-12-17		Female	68		Colorectal	ZCH							EpCAM	3
2017-12-18		Male	46		Pancreas (PDAS)	SAH							CSV	12
2017-12-18		Male	55		Colorectal	ZCH							EpCAM	20
2017-12-18		Male	55		Colorectal	ZCH							CSV	9
2017-12-19		Female	62		Breast	SRR	ductal	pT2N1M0	ⅡB				EpCAM	0
2017-12-19		Female	14		Ovary	SRR	mucous		Ⅳ				CSV	4
2017-12-19		Female	53		HNSCC	SAH							EpCAM	0
2017-12-19		Male	63		Colorectal	SAH							CSV	0
2017-12-19		Male	55		Lung	ZCH							CSV	6
2017-12-19		Female	58		HNSCC	ZCH		cT3N2M0					EpCAM	2
2017-12-19		Male	50		Pancreas (PDAS)	ZCH							EpCAM	0
2017-12-19		Female	50		Pancreas (PDAS)	ZCH							CSV	2
2017-12-20		Male	62		Healthy	SRR							CSV	1
2017-12-20		Male	58		Prostate	SAH							CSV	0
2017-12-20		Male	43		Prostate	SAH							EpCAM	0
2017-12-20		Male	45		Stomach (gastric)	ZCH							EpCAM	8
2017-12-23		Female	60		Lung	SAH		T1N0M0	ⅠA				EpCAM	0
2017-12-23		Female	36		Breast	SAH	ductal						EpCAM	6
2017-12-23		Male	63		Colorectal	SRR							CSV	4
2017-12-23		Male	59		Prostate	SAH							CSV	5
2017-12-23		Male	55		Esophageal	SAH							CSV	0
2017-12-23		Male	63		Stomach (gastric)	ZCH							EpCAM	5
2017-12-24		Female	58		HNSCC	SAH		T2N1AM0	II				EpCAM	4
2017-12-24		Female	66		Breast	SAH	ductal						EpCAM	3
2017-12-24		Male	47		Stomach (gastric)	ZCH							CSV	2
2017-12-24		Female	61		Colorectal	ZCH							CSV	1
2017-12-25		Male	69		Esophageal	ZCH	squamous cell carcinoma	T4N1Mx					CSV	4
2017-12-25		Male	45		Lung	SAH							CSV	2
2017-12-25		Male	63		Healthy	SAH							EpCAM	0
2017-12-25		Female	63		Pancreas (PDAS)	SAH							CSV	0
2017-12-25		Male	59		Stomach (gastric)	SAH							CSV	4
2017-12-25		Male	60		Lung	ZCH							CSV	3
2017-12-26		Female	42		Cervical	SRR	squamous cell carcinoma		IV				EpCAM	2
2017-12-26		Female	54		Breast	SRR	ductal						CSV	2
2017-12-26		Female	44		Breast	SRR							CSV	0
2017-12-26		Male	38		Lung	SAH							CSV	6
2017-12-26		Male	57		Lung	SAH							CSV	0
2017-12-27		Female	70		Ovary	SRR							EpCAM	0
2017-12-27		Male	38		HNSCC	SAH							CSV	3
2017-12-27		Female	43		Healthy	SAH							CSV	0
2017-12-27		Male	66		Lung	ZCH							EpCAM	4
2017-12-28		Female	53		Lung	ZCH							EpCAM	3
2017-12-28		Male	59		Prostate	ZCH							EpCAM	3
2017-12-31		Male	45		Colorectal	ZCH		cT4bN2M0	ⅢC				EpCAM	11
2017-12-31		Male	57		Prostate	SAH			IV				EpCAM	4
2017-12-31		Female	44		Cervical	SRR							CSV	6
2017-12-31		Female	65		Lung	SAH							CSV	0
2017-12-31		Female	62		Esophageal	SAH							CSV	5
2017-12-31		Male	62		Lung	ZCH							CSV	1
2018-01-03		Male	44		Pancreas (PDAS)	ZCH							CSV	0
2018-01-11		Female	50		Healthy	SRR							CSV	0
2018-01-12		Male	46		Stomach (gastric)	ZCH							EpCAM	0
2018-01-12		Male	46		Stomach (gastric)	ZCH							CSV	2
2018-01-23		Male	58		Pancreas (PDAS)	SAH							EpCAM	0
2018-01-23		Male	58		Pancreas (PDAS)	SAH							CSV	2
2018-03-01		Female	60		Pancreas (PDAS)	SAH							CSV	0
2018-03-13		Male	74		Pancreas (PDAS)	SRR							CSV	0
2018-03-13		Male	63		Pancreas (PDAS)	SAH							CSV	0
2018-03-13		Male	63		Pancreas (PDAS)	SAH							EpCAM	1
2018-03-13		Female	56		Pancreas (PDAS)	SAH							EpCAM	0
2018-03-14		Male	60		Lung	SRR		T1cN0M0	ⅠA3				EpCAM	0
2018-03-14		Male	54		Lung	SAH		（T1cN0M0）					EpCAM	2
2018-03-15		Female	58		HNSCC	SRR	nonkeratinized squamous cell carcinoma	T2N2M0	III				CSV	0
2018-03-15		Female	59		Breast	SAH		T3N2M1					CSV	2
2018-03-15		Male	46		Pancreas (PDAS)	SAH							CSV	0
2018-03-15		Male	46		Pancreas (PDAS)	SAH							EpCAM	1
2018-03-22		Female	47		Lung	SAH							EpCAM	0
2018-03-22		Female	66		Pancreas (PDAS)	SAH							CSV	0
2018-03-27		Male	50		Lung	SRR							EpCAM	3
2018-03-29		Female	35		Pancreas (PDAS)	SAH							CSV	7
2018-04-01		Female	26		Brain (Glioma)	ZCH							CSV	0
2018-04-07		Male	64		Lung	SRR							EpCAM	4
2018-04-07		Male	46		Pancreas (PDAS)	SAH							CSV	0
2018-04-09		Male	49		Lung	SAH		cT4N3M1c	ⅣB				EpCAM	0
2018-04-10		Male	69		Lung	SAH							CSV	1
2018-04-10		Male	58		Pancreas (PDAS)	SAH							EpCAM	0
2018-04-11		Female	59		Breast	ZCH	ductal	ypT2N1M0	IIA				CSV	4
2018-04-11		Male	49		Lung	SRR							CSV	2
2018-04-11		Male	55		Pancreas (PDAS)	SAH							CSV	0
2018-04-15		Female	51		Breast	SAH							CSV	3
2018-04-16		Male	47		Stomach (gastric)	SAH	squamous cell carcinoma	T4N1M1	ⅣB				CSV	7
2018-04-16		Female	54		Esophageal	ZCH	squamous cell carcinoma	T3N1M0					EpCAM	6
2018-04-17		Female	74		Healthy	SRR							CSV	0
2018-04-17		Female	44		Breast	SAH							EpCAM	3
2018-04-17		Female	44		Breast	SAH							CSV	1
2018-04-17		Female	76		Colorectal	SAH							CSV	1
2018-04-17		Female	57		Bladder	ZCH		T2N0M0					CSV	2
2018-04-18		Female	79		Breast	SAH	ductal						CSV	0
2018-04-18		Male	60		Healthy	SRR							CSV	0
2018-04-18		Female	47		Cervical	SRR							CSV	2
2018-04-19		Female	37		Lung	SRR		pT1bN0M0	ⅠA2				EpCAM	0
2018-04-22		Female	61		Pancreas (PDAS)	SAH							CSV	0
2018-04-23		Male	65		Lung	ZCH		cT1bN2M1a	Ⅳa				EpCAM	2
2018-04-23		Female	54		Breast	ZCH		T2N0M0	IIA				EpCAM	3
2018-04-23		Male	66		Colorectal	SAH							CSV	5
2018-04-23		Female	64		Lung	ZCH							CSV	4
2018-04-25		Male	44		Lung	SRR	adenocarcinoma	T1bN0M0	ⅠA				EpCAM	3
2018-04-25		Female	74		Lung	SRR							EpCAM	0
2018-04-25		Male	61		Lung	SAH							CSV	3
2018-04-25		Female	65		Lung	SAH							CSV	0
2018-04-25		Female	67		Lung	ZCH							CSV	2
2018-04-26		Male	57		Lung	SAH	adenocarcinoma	cT1aN1M1c	Ⅳb				EpCAM	6
2018-04-29		Female	68		Lung	ZCH	adenocarcinoma	T2bN2M0	ⅢA				EpCAM	4
2018-04-29		Male	45		Healthy	SRR							CSV	0
2018-04-30		Male	70		Lung	SRR	adenocarcinoma	T4N3M0	ⅢB				EpCAM	2
